# Supplementary material
Source: publisher site journal article supplement (https://www.dovepress.com/article/280261)
Supplement: Supplementary file 1 [file get_supplementary_file.php]

**Supplementary Table S1 : Detailed history of physical activity among studied females according to knowledge level**

| **Studied groups**  **Item** | **Poor Knowledge Score < 7**  **n.=264** | **Good Knowledge Score ≥ 7**  **n.=181** | **(X2)** | ***P*-value** |
| --- | --- | --- | --- | --- |
| **no. (%)** | **no. (%)** |
| **Frequency PA practice /week**  **- Rarely**  **-1-3 hours**  **- ≥ 4 hours** | 105 (39.8)  87 (33.0)  72 (27.2) | 67 (37.0)  59 (32.6)  55 (30.4) | 0.58 | 0.7 |
| **Practicing brisk walking** | 159 (60.2) | 112 (63.0) | 1.12 | 0.5 |
| **Practicing games (soccer, basketball, volleyball…)** | 69 (26.1) | 69 (38.1) | 7.21 | 0.008* |
| **Practicing cycling/running** | 120 (45.5) | 93 (51.4) | 1.51 | 0.2 |

**Supplementary Table S2: Logistic regression analysis for assessment of some factors affecting BMD**

| **Risk Factors** | **B** | **Wald** | ***P*-value** |
| --- | --- | --- | --- |
| **Knowledge score category** | 1.191 | 12.452 | 0.000* |
| **Carbonated beverages daily consumption** | 1.378 | 11.301 | 0.001* |
| **Place of exposure to sun light** | -0.933 | 7.244 | 0.007* |
| **Exercise Level** | -0.508 | 6.980 | 0.008* |
| **Coffee consumption** | 1.482 | 4.066 | 0.044* |

**P* ≤ 0.05 is significant
